# Supplementary material
Source: PubMed Central journal article supplement (PMC8205694)
Supplement: ajtr0013-5512-f2.pdf [file ajtr0013-5512-f2.pdf]

## The effect of continuing care

**Supplementary Table 1.** Satisfaction survey scale

| Items                                                                                                                                        | Satisfaction in care |                     |              |
|----------------------------------------------------------------------------------------------------------------------------------------------|----------------------|---------------------|--------------|
|                                                                                                                                              | Satisfied            | Basically satisfied | Dissatisfied |
| 1. When you needed help, the nurse could meet your needs                                                                                     |                      |                     |              |
| 2. When you asked questions, the nurse could answer patiently                                                                                |                      |                     |              |
| 3. Were you satisfied with the service attitude and civilized language of the nurse                                                          |                      |                     |              |
| 4. When you learned about the disease, were you satisfied with the answer                                                                    |                      |                     |              |
| 5. The nurse instructed you to take medicines                                                                                                |                      |                     |              |
| 6. The nurse guided you on the methods of rehabilitation exercise and explained the knowledge on prevention and health care of complications |                      |                     |              |
| 7. When you were discharged, the nurse initiatively explained precautions after discharge                                                    |                      |                     |              |
| 8. The nurse made a reasonable rehabilitation plan for you                                                                                   |                      |                     |              |
| 9. You were offered with a face-to-face consultation service for 30-40 minutes every two weeks                                               |                      |                     |              |
| 10. The nurse provided you with patient hotline and SMS services                                                                             |                      |                     |              |
| 11. Health knowledge on postoperative hip rehabilitation was daily propagated through text messages and WeChat platform                      |                      |                     |              |
| 12. The nurse provided psychological consultation                                                                                            |                      |                     |              |
| What are your dissatisfactions or reasonable suggestions                                                                                     |                      |                     |              |
